# Supplementary material
Source: publisher figshare collection journal article supplement (https://acs.figshare.com/ndownloader/files/23540239)

# Supplementary Materials

## **Discovery of triazolo-pyridazine/-pyrimidine derivatives bearing aromatic (heterocycle)-coupled azoles units as Class II c-Met inhibitors**

Qian Zhang<sup>a,1</sup>, Xiaobo Liu<sup>a,1</sup>, Wenhui Gan<sup>a</sup>, Jinjin Wu<sup>a</sup>, Hualan Zhou<sup>a</sup>, Zunhua Yang<sup>b</sup>, Yiling Zhang<sup>b</sup>, Min Liao<sup>a</sup>, Ping Yuan<sup>a</sup>, Shan Xu<sup>a</sup>, Pengwu Zheng<sup>a\*</sup>, Wufu Zhu<sup>a\*</sup>

<sup>a</sup> Jiangxi Provincial Key Laboratory of Drug Design and Evaluation, School of Pharmacy, Jiangxi Science & Technology Normal University, 605 Fenglin Road, Nanchang, Jiangxi 330013, China <sup>b</sup> College of Pharmacy, Jiangxi University of Traditional Chinese Medicine, Nanchang, 330004, China

\* **Corresponding author.** Tel. & Fax: +86 791 8380-2393; E-mail: zhengpw @126.com (P. Zheng), zhuwufu-1122@163.com (W. Zhu)

# $^1\text{H}$ NMR Spectral

Figure S1: 12c.  $^1\text{H}$  NMR (400 MHz). Solvent:  $\text{DMSO-}d_6$

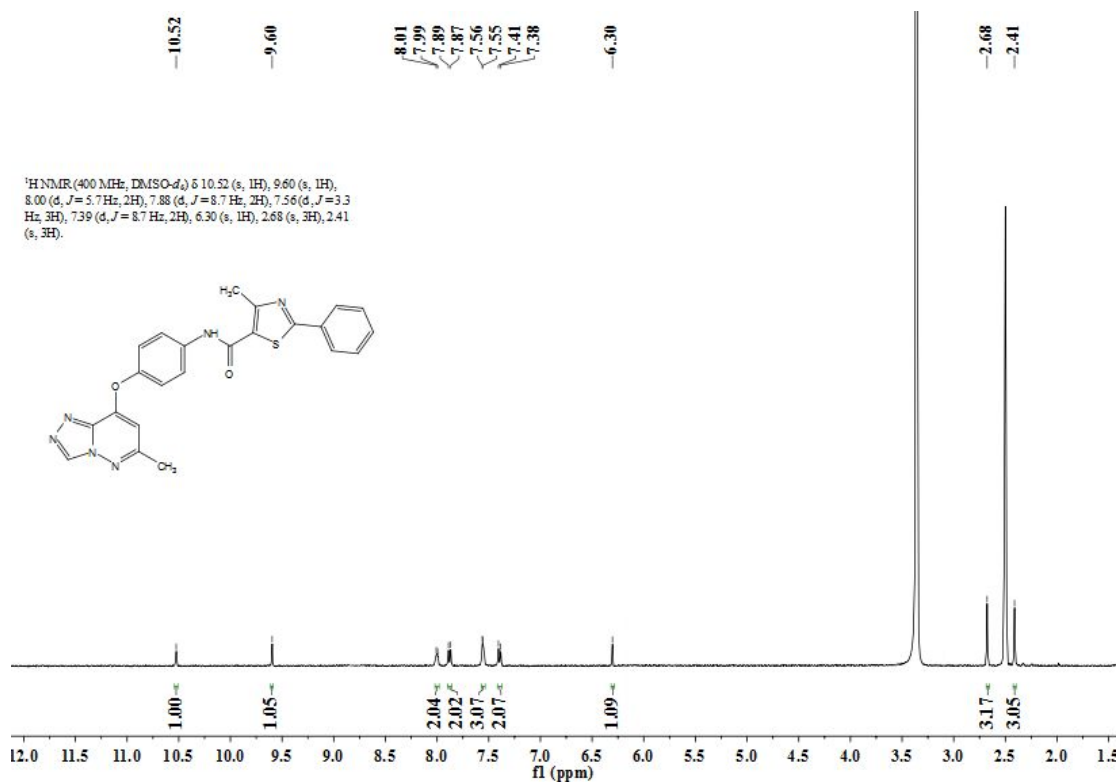

Figure S2: 12e. <sup>1</sup>H NMR (400 MHz). Solvent: DMSO-*d*<sub>6</sub>

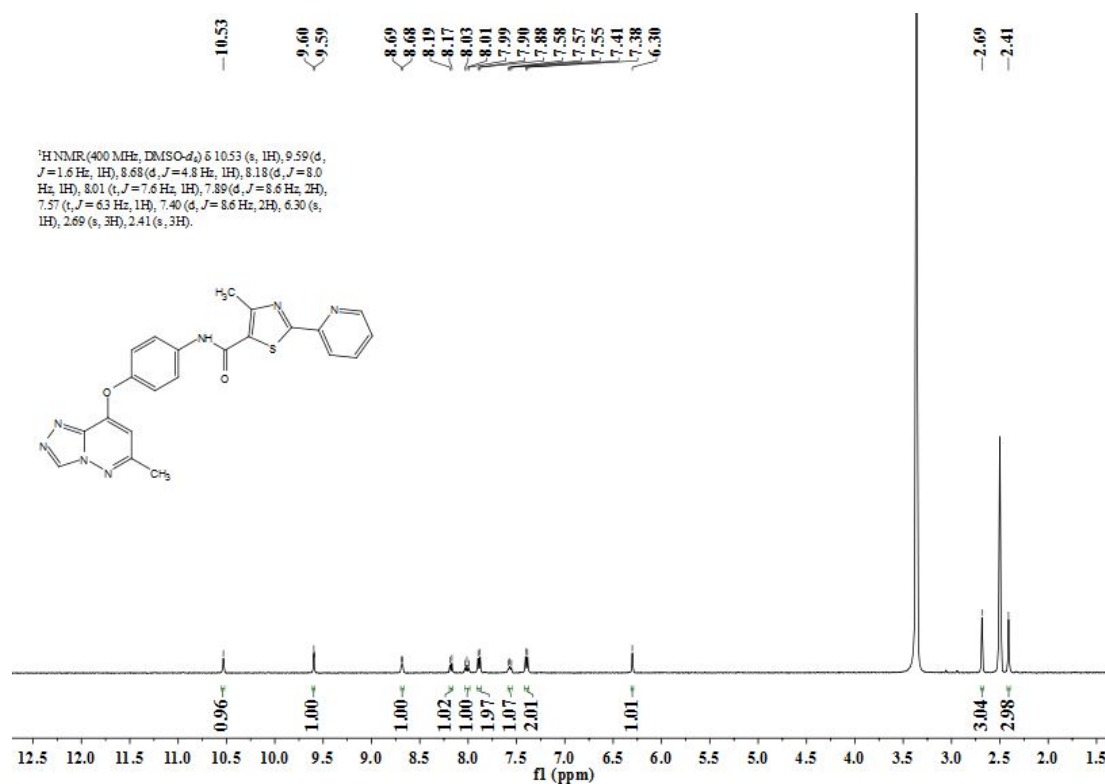

**Figure S3: 13e.**  $^1\text{H}$  NMR (400 MHz). Solvent:  $\text{DMSO-}d_6$

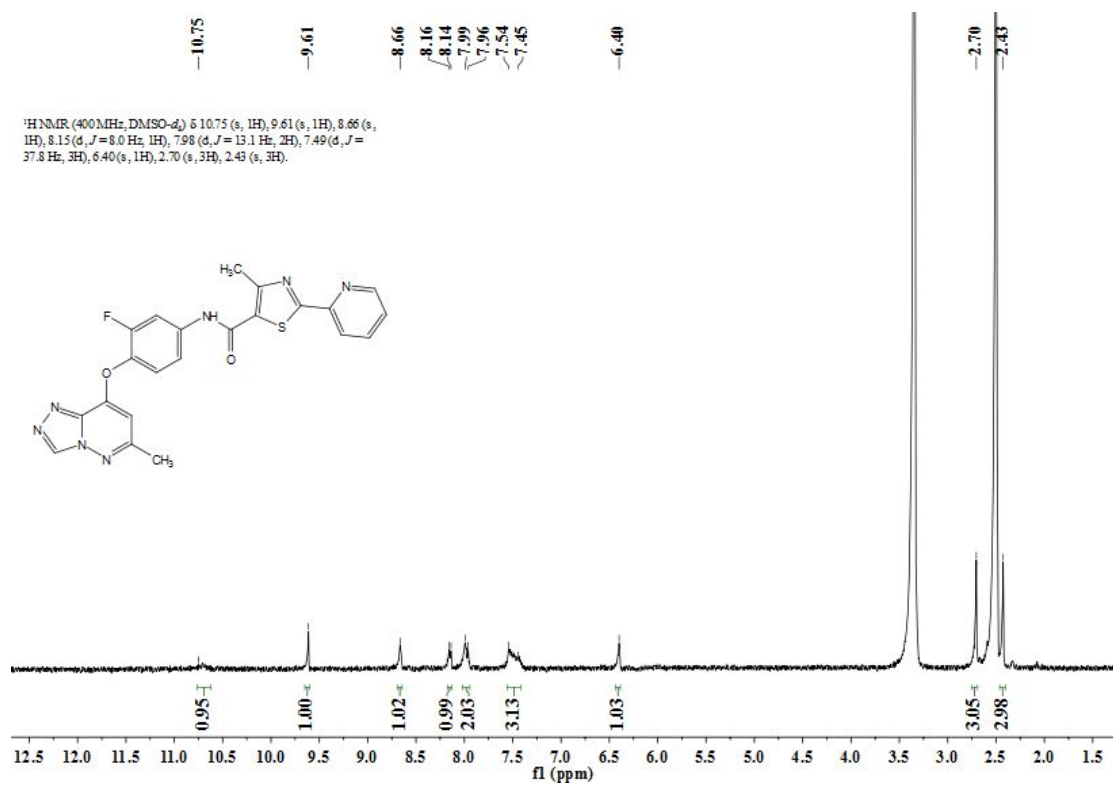

**Figure S4: 18f.**  $^1\text{H}$  NMR (400 MHz). Solvent:  $\text{DMSO-}d_6$

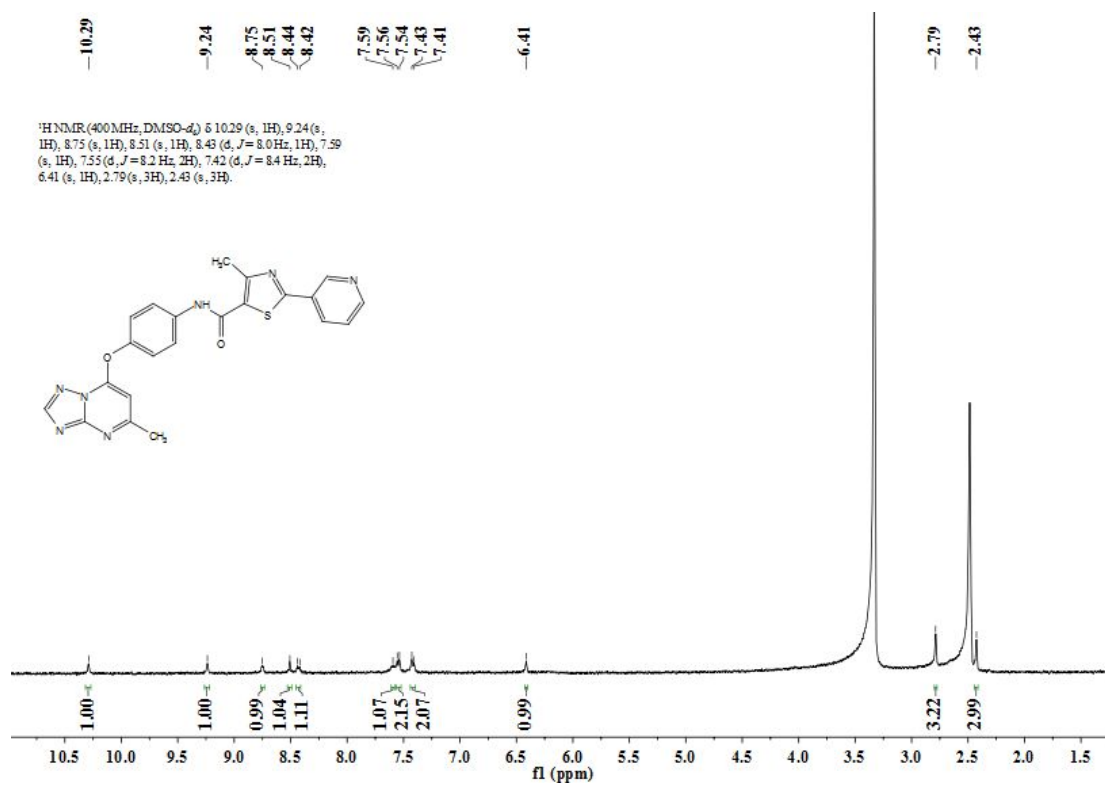

**Figure S5: 19e.**  $^1\text{H}$  NMR (400 MHz). Solvent:  $\text{DMSO-}d_6$

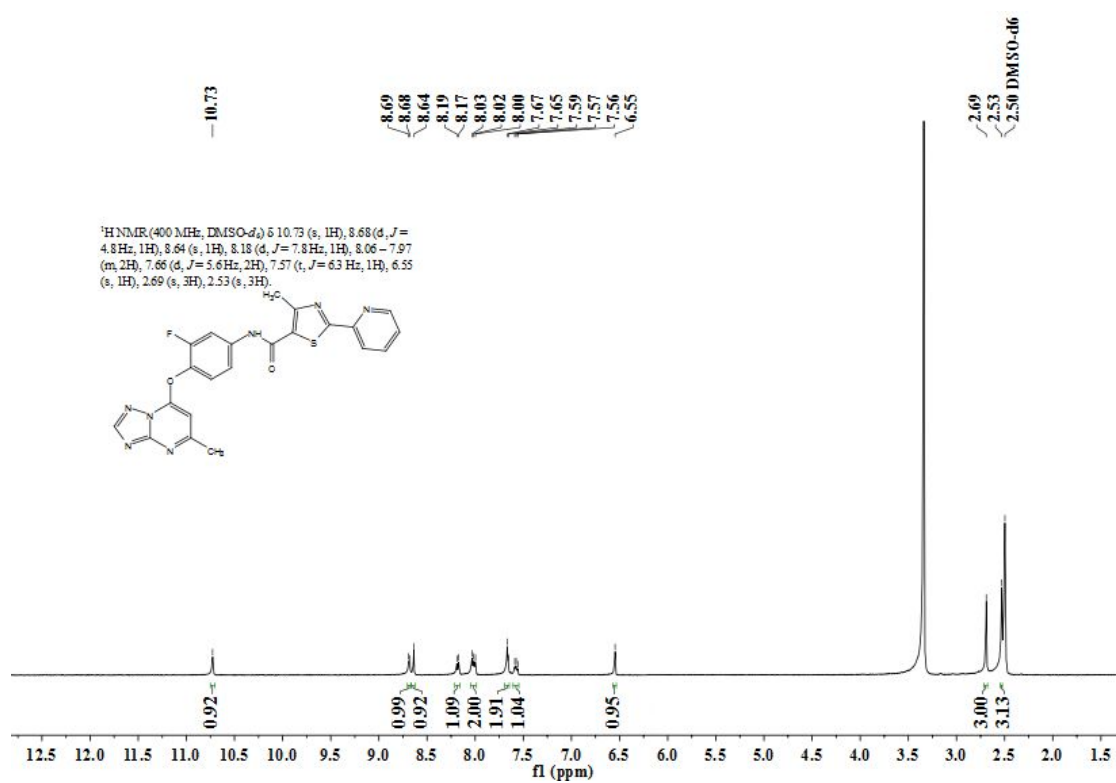

# TOF MS analytical data

**Figure S6: 13b** Solvent: CH<sub>3</sub>OH.

TOF MS ES+ (m/z): [M + H]<sup>+</sup>, calcd for C<sub>23</sub>H<sub>14</sub>ClF<sub>4</sub>N<sub>7</sub>O<sub>2</sub>: 532.0912, found, 532.0919.



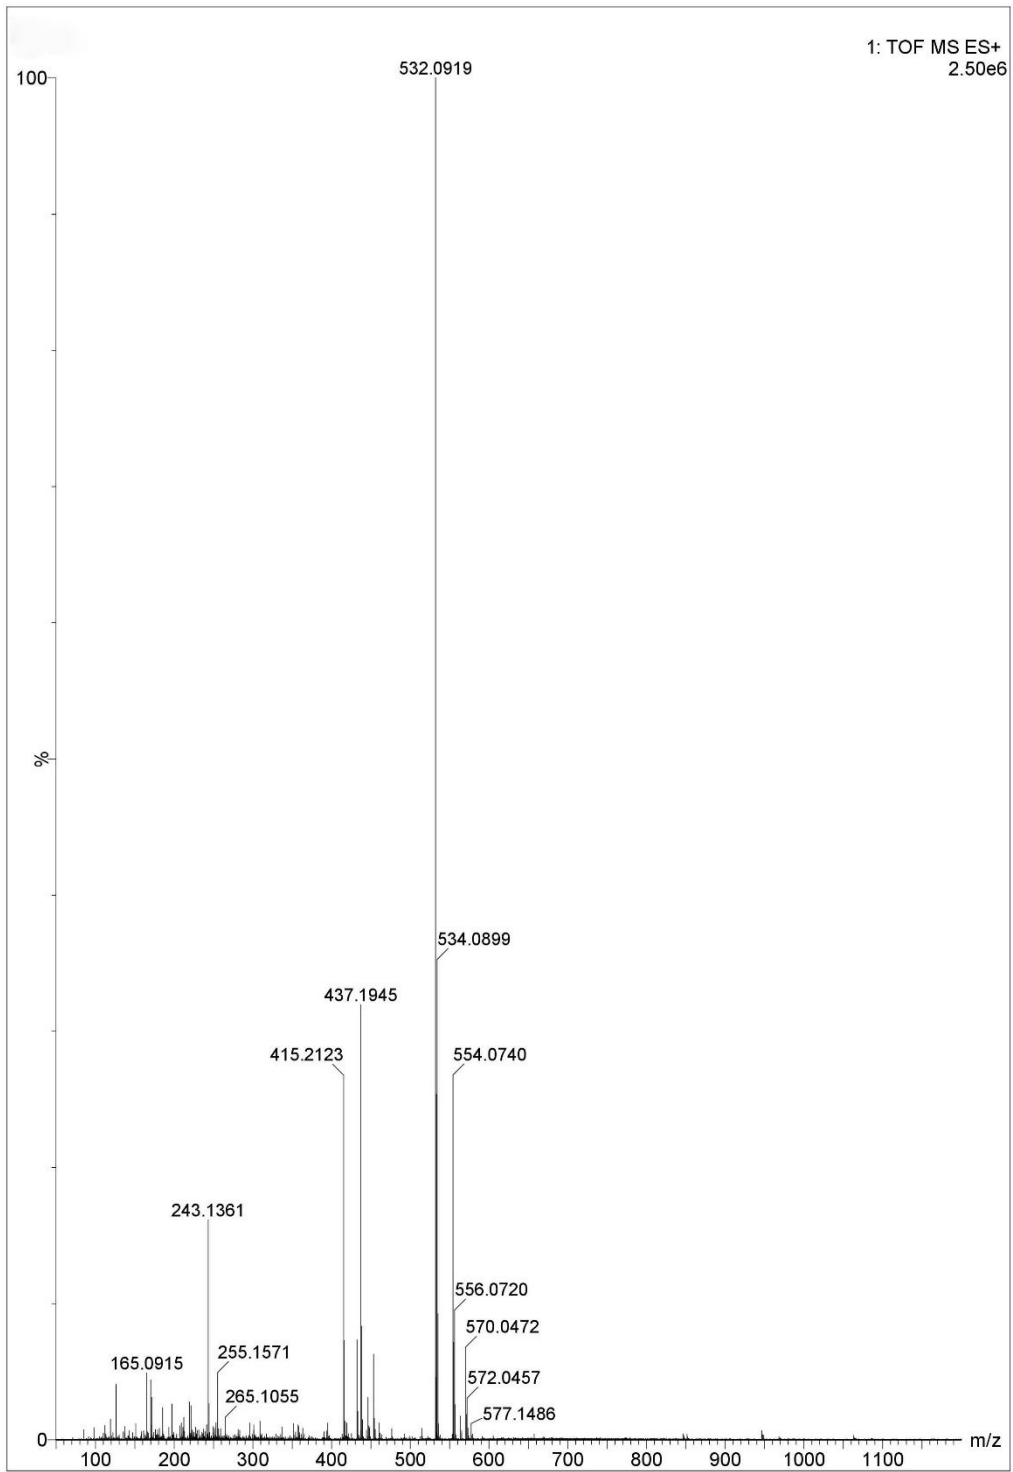

**Figure S7: 13c** Solvent: CH<sub>3</sub>OH.

TOF MS ES+ (m/z): [M + H]<sup>+</sup>, calcd for C<sub>23</sub>H<sub>17</sub>FN<sub>6</sub>O<sub>2</sub>S: 461.1196, found, 461.1197.

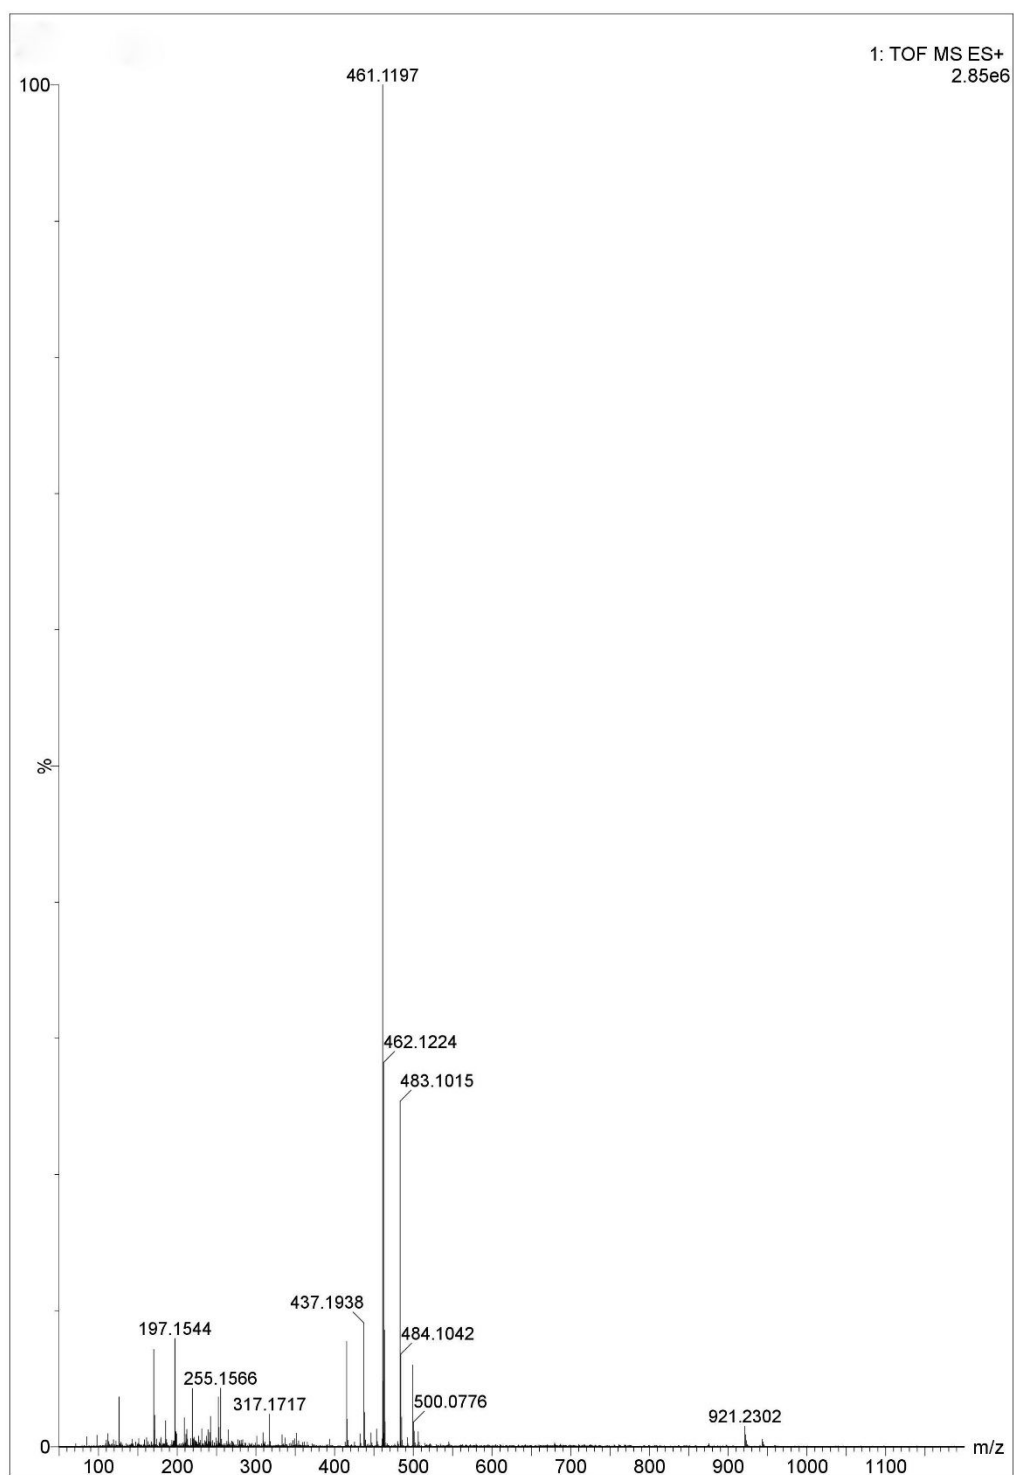

**Figure S8: 13g Solvent: CH<sub>3</sub>OH.**

TOF MS ES+ (m/z): [M + H]<sup>+</sup>, calcd for C<sub>22</sub>H<sub>16</sub>FN<sub>7</sub>O<sub>2</sub>S: 462.1148, found, 462.1147.

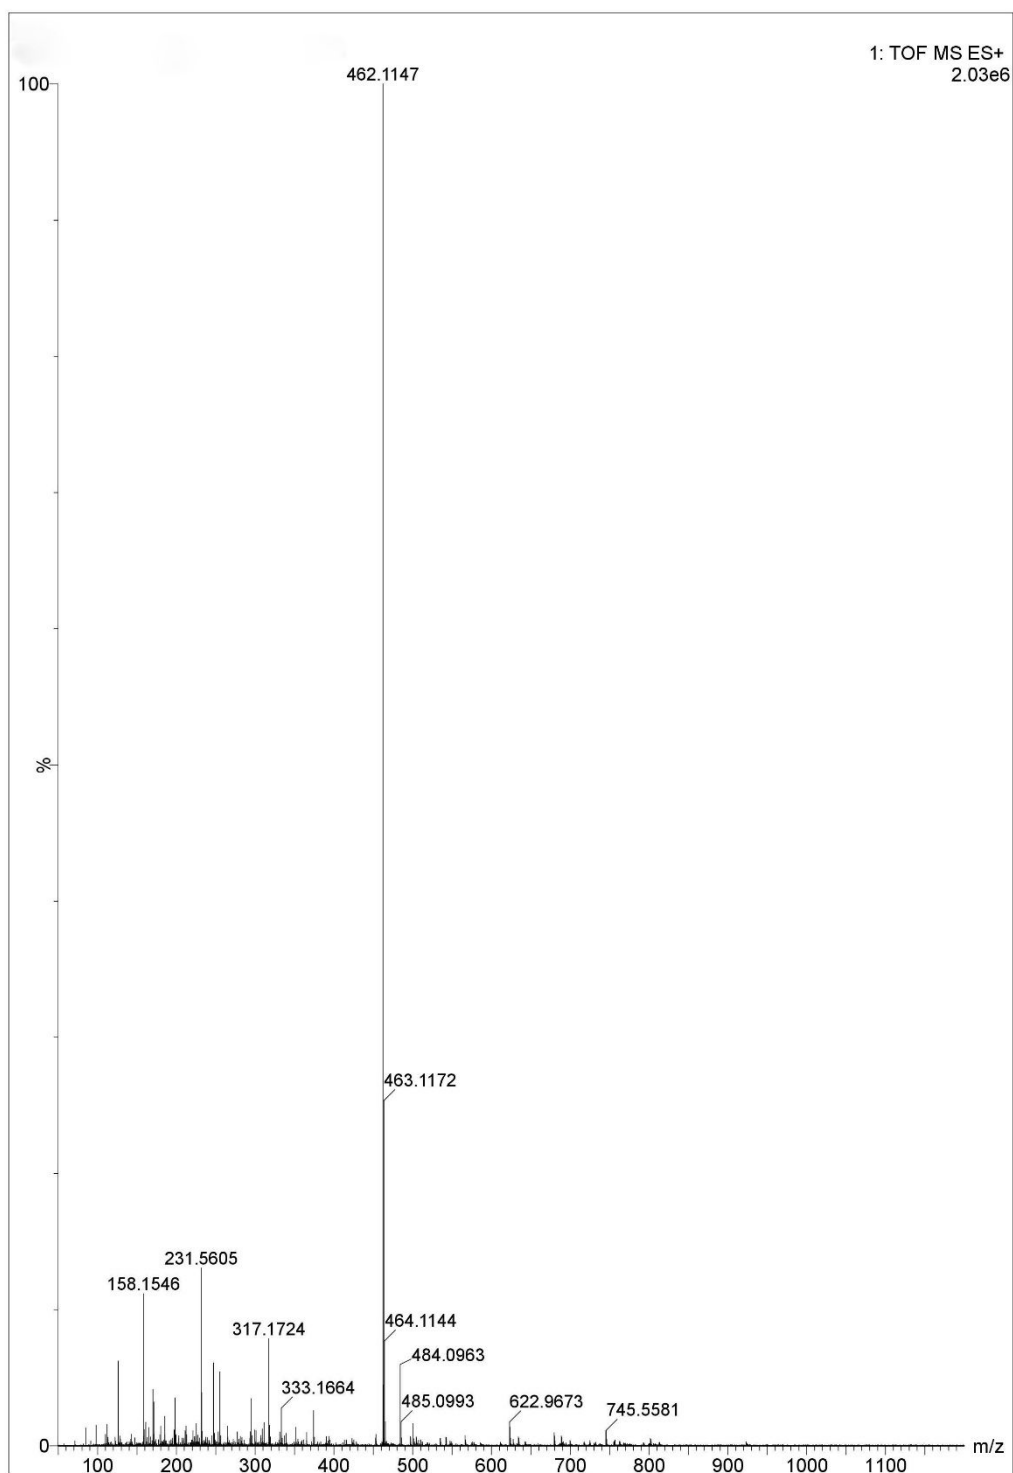

Supplement: Supplementary file 1 [file 23540239]
